# Supplementary material for: Quantitative trait loci and transcriptome signatures associated with avian heritable resistance to Campylobacter
Source: PubMed Central journal article supplement (PMC7804197; doi:10.1038/s41598-020-79005-7), 2021-01-12

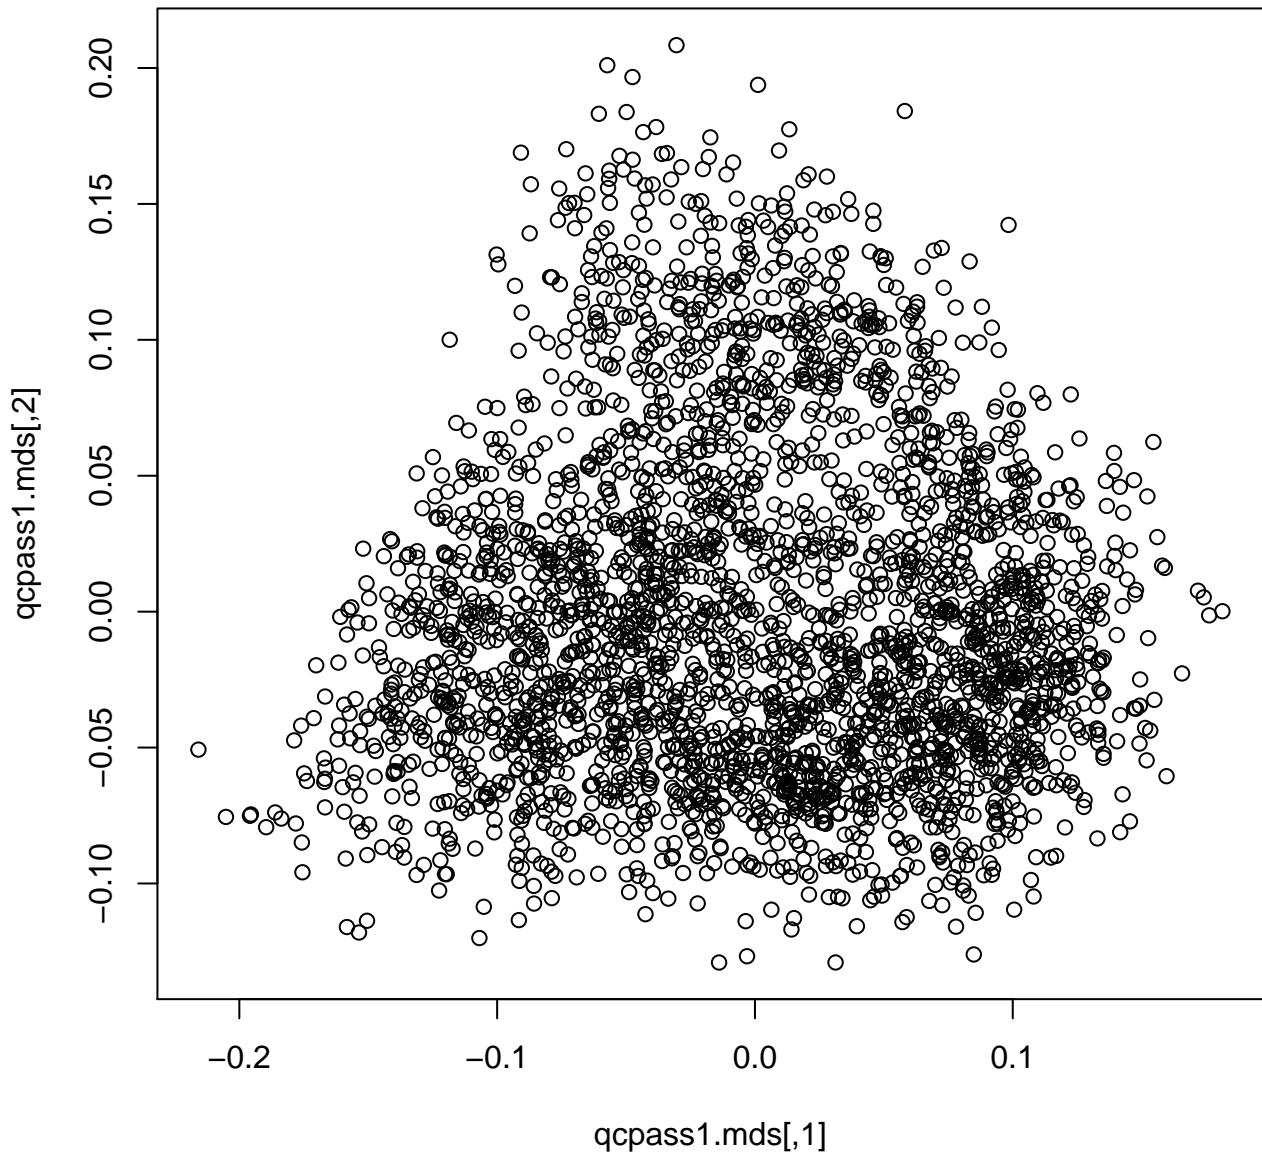

Supplement: 41598_2020_79005_MOESM1_ESM.pdf [file 41598_2020_79005_MOESM1_ESM.pdf]
